# Supplementary material for: Catalytic residues and a predicted structure of tetrahydrobiopterin-dependent alkylglycerol mono-oxygenase
Source: Oxford University Press journal article supplement (doi:10.1042/bj20111509), 2012-01-09
Supplement: bj4430279add.pdf [file bj4430279add.pdf]

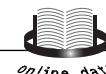

SUPPLEMENTARY ONLINE DATA

Catalytic residues and a predicted structure of tetrahydrobiopterin-dependent alkylglycerol mono-oxygenase

Katrin WATSCHINGER\*, Julian E. FUCHS†, Vladimir YAROV-YAROVY‡, Markus A. KELLER\*, Georg GOLDERER\*, Albin HERMETTER§, Gabriele WERNER-FELMAYER\*, Nicolas HULO|| and Ernst R. WERNER\*<sup>1</sup>

\*Division of Biological Chemistry, Biocenter, Innsbruck Medical University, Fritz-Pregl-Strasse 3/VI, A-6020 Innsbruck, Austria, †Institute of General, Inorganic and Theoretical Chemistry, Innrain 52a, Leopold Franzens University Innsbruck, A-6020 Innsbruck, Austria, ‡Department of Physiology and Membrane Biology, School of Medicine, Room 4131, Tupper Hall, University of California, Davis, One Shields Avenue, Davis, CA 95616, U.S.A., §Institute of Biochemistry, Graz University of Technology, Petersgasse 12/2, A-8010 Graz, Austria, and ||Swiss Institute for Bioinformatics, Centre Medical Universitaire, 1 rue Michel Servet, CH-1211 Geneva, Switzerland

Table S1 Forward and reverse primer sequences for introduction of mutations by QuikChange® site-directed mutagenesis

(a) Alkylglycerol mono-oxygenase

| Mutation | Forward primer (5'→3')                         | Reverse primer (5'→3')                          |
|----------|------------------------------------------------|-------------------------------------------------|
| D125A    | GCCTTCTTAGGAGTTGCCTTTGGCTACTACTGG              | CCAGTAGTAGCCAAAGGCAACTCCTAAGAAGGC               |
| E137A    | CCATCGTATGGCGCATGCAGTTAATATTATGTGGGCC          | GGCCACATAAATTAACATGCATGCGCCATACGATGG            |
| Q146A    | ATGTGGCCGGGCATGCAACACATCATAGTTCTGAAGAC         | GTCTTCAGAATCATGATGTGTGTCATGCCCGCCACAT           |
| E152A    | CACATCATAGTTCTGCAGACTATAACTTATCCACAGC          | GCTGTGGATAAGTTATAGTCTGCAGAACTATGATGTG           |
| D153A    | CACATCATAGTTCTGAAGCTTATAACTTATCCACAGCACTGAG    | CTCAGTGTGTGGATAAGTTATAAGCTTCAGAACTATGATGTG      |
| Q162A    | CTTATCCACAGCACTGCGCGCTGTCTCCTCCAGATAT          | ATATCTGGAGGACAGACGCGCAGTGTGTGGATAAG             |
| Q166A    | CACTGAGACAGTGTCTCCTCGGATATATACTTCTGTGG         | CCAGGAAGTATATATCGCGAGGACAGACTGTCTCAGTG          |
| Y174A    | CTTCTGGATTTTCGCGAGTCCCTGGCCCTCTTC              | GAAGAGGGCCAGGGACTCGCGAAAATCCAGGAAG              |
| H189A    | CCCCCTTCAGTATATGCTGTAGCGCTCAATTCATCTTTTACC     | GGTAAAGAAGATTGAATTAAGCGCTACAGCATATACTGAAGGGGG   |
| Q191A    | CCCCTTCAGTATATGCTGTATCTTGCATTCAGTCAATCTTCTTACC | GGTAAAGAAGATTGAATTAAGCGCTACAGCATATACTGAAGGGGG   |
| Q197A    | CTTCAATTCATCTTCTTACGCGTTTTGGATCCATACAGAGGTC    | GACCTCTGTATGGATCCAAAACGCGTAAAGAAGATTGAATGAAG    |
| H201A    | CTTTACCAATTTTGGATCGCTACAGAGGTCATCAATAACC       | GGTTATTGATGACCTCTGTAGCGATCCAAAATTTGGTAAAG       |
| E203A    | GGATCCATACAGCTGTATCAATAACCTTGGTCC              | GGACCAAGGTTATTGATGACAGCTGTATGGATCC              |
| E212A    | CCTTGGTCCTTTAGCGCTGATTCCTTAATACTCCTAGCC        | GGCTAGGAGTATAAGAATCAGCGCTAAAGGACCAAGG           |
| H220A    | GATTCCTAATACTCCTAGCGCTCATAGGGTTCATCATGGCAG     | CTGCCATGATGAACCCATATGAGCGCTAGGAGTATAAGAATC      |
| Y230A    | CATGGCAGAAATCGTGCATGCATAGACAAAATATGCTGGTG      | CACAGCATAAATTTTTGTCTATGATGCACGATTTCTGCCATG      |
| C231A    | CATCATGGCAGAAATCGGTACGCCATAGACAAAATATGCTGGTG   | CCAGCATAAATTTTTGTCTATGGCGTACCGATTTCTGCCATGATG   |
| D233A    | CATGGCAGAAATCGTATTGATCGCGAAAATATGCTGGTGTTCC    | GAACACCAGCATAAATTTTTCGCGATGCAATAACGATTTCTGCCATG |
| N235A    | GGCAGAAATCGTATTGATAGACAAAAGCTTATGCTGGTGTTCC    | GAACACCAGCATAAAGCTTTGTCTATGCAATAACGATTTCTGCC    |
| Y236A    | CGTTATTGATAGACAAAATGCGCGCGGTCTTATTATTGGG       | CCCAAATAAAGAACACCGCGCATTTTTGTCTATGCAATAACG      |
| Y338A    | CATCTCAGCTATAAAGATAGCTACAGTTGTACAGTTTGTCTCG    | CAGAGCAAACCTGTACAACCTGTAGCTATCTTTAATAGCTGAGATG  |
| W243A    | GCTGGTGTCTTATTATTGCGGATAAGATTTTTGGGACATTTGAAGC | GCTTCAAATGTCCAAAATCTTATCCGCAATAAAGAACCACCGC     |
| D244A    | GCTGGTGTCTTATTATTGGGCTAAGATTTTTGGGACATTTGAAGC  | GCTTCAAATGTCCAAAATCTTATCCGCAATAAAGAACCACCGC     |
| D384A    | GACTTCCATTGGATTTCTGCTAGCTCAAAGACCCAAAGGCAGC    | GCTGCTTGGGCTTTTGTAGCTAGCAGAAATCCAAATGGAAGTC     |
| R396A    | GGCAGCTATTATGAAACTCTCGCATGCTTGTATGTTCTTAATGC   | GCATTAAGAATCATCAGCATGCGAGAGTTTCCATAATAGCTGCC    |
| C397A    | GGAAACTCTCCGAGCGCTGATGTTCTTAATGCTGTACCCG       | CGGTACAGCATTAAAGAATCAGCGCTCGGAGAGTTTCC          |

(b) Phenylalanine hydroxylase

| Mutation | Forward primer (5'→3')                  | Reverse primer (5'→3')                    |
|----------|-----------------------------------------|-------------------------------------------|
| E286A    | CCTGAACCTGACATCTGCCACGCGTGTGGGACATGTGCC | GGCAGATGTCCCAACACGCGTGGCAGATGTCAGGTTCCAGG |

Received 22 August 2011/22 December 2011; accepted 6 January 2012  
 Published as BJ Immediate Publication 6 January 2012, doi:10.1042/BJ20111509

<sup>1</sup> To whom correspondence should be addressed (email ernst.r.werner@i-med.ac.at).
